# Supplementary material for: Water-soluble hyaluronic acid–hybridized polyaniline nanoparticles for effectively targeted photothermal therapy
Source: Royal Society of Chemistry journal article supplement (doi:10.1039/c4tb01738b), 2015-01-01
Supplement: c4tb01738b1.pdf [file c4tb01738b1.pdf]

# **Water-Soluble Hyaluronic Acid-Hybridized Polyaniline Nanoparticles for Effectively Targeted Photothermal Therapy**

*Bang-Ping Jiang,<sup>‡</sup> Li Zhang,<sup>‡</sup> Yang Zhu, Xing-Can Shen\* , Shi-Chen Ji, Xue-You  
Tan, Lei Cheng and Hong Liang\**

*Ministry of Education Key Laboratory for the Chemistry and Molecular Engineering  
of Medicinal Resources, School of Chemistry and Pharmaceutical Science, Guangxi  
Normal University, Guilin, 541004, P. R. China.  
Tel: (+86) 773-5846273; E-mail: xcshen@mailbox.gxnu.edu.cn; hliang@gxnu.edu.cn*

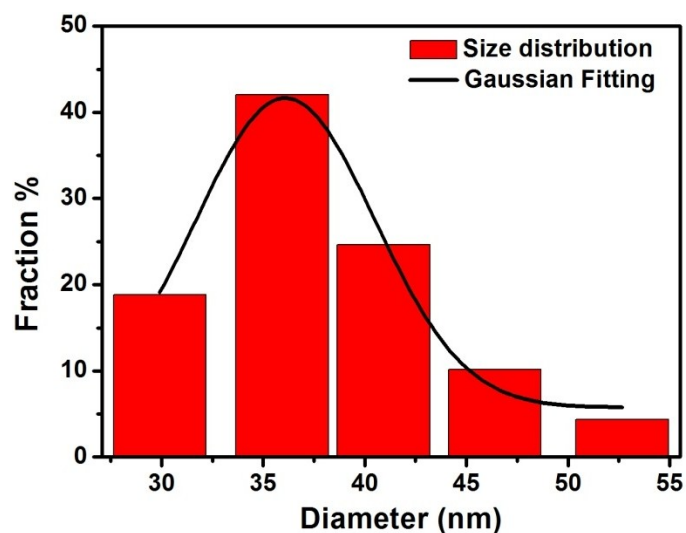

**Fig. S1** The size distribution of HA-PANI NPs in SEM image.

|               |                  |              |            |
|---------------|------------------|--------------|------------|
| STOPPED       |                  | Samples:     | 4.8824e+06 |
| First Delay:  | 5.0 $\mu$ sec    | Atot:        | 3.1417e+06 |
| Last Delay:   | 5.0 msec         | A CR (avg.): | 128.7 kcps |
| Elapsed Time: | 00:01:00         | Btot:        | 3.3350e+06 |
| Wavelength:   | 532.0 nm         | M. Base:     | 2.1476e+06 |
| Angle:        | 90.0             | C. Base:     | 2.1459e+06 |
| Temp:         | 25.2 deg C (GTE) | Base diff:   | 0.076%     |
| Liquid:       | Water            | Eff Dia:     | 97.8 nm    |
| Viscosity:    | 0.886 cP         | Poly:        | 0.043      |
| Ref Index:    | 1.334            |              |            |

**Fig. S2** DLS data of HA-PANI NPs.

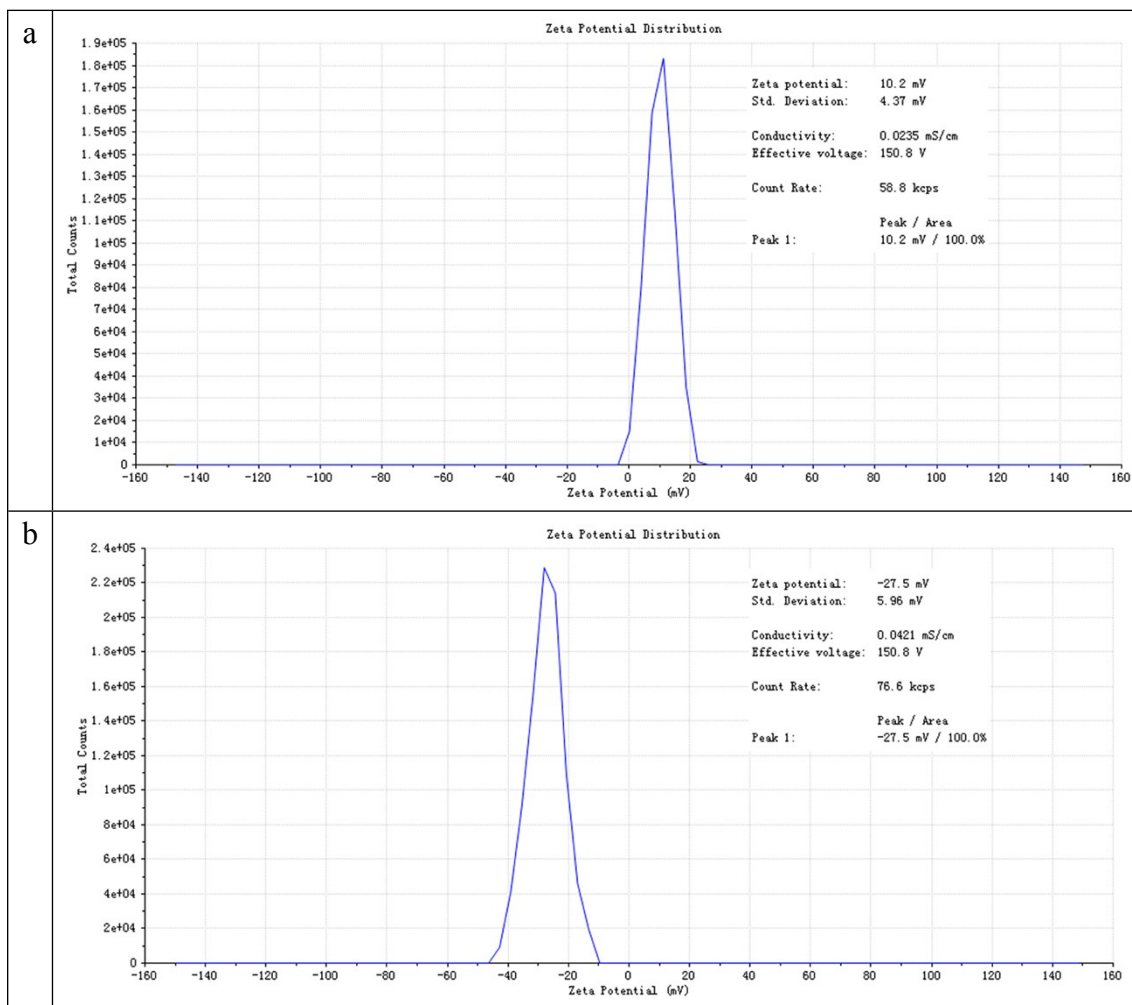

**Fig. S3** Zeta-potential data of PANI (a) and HA-PANI NPs (b) in water.

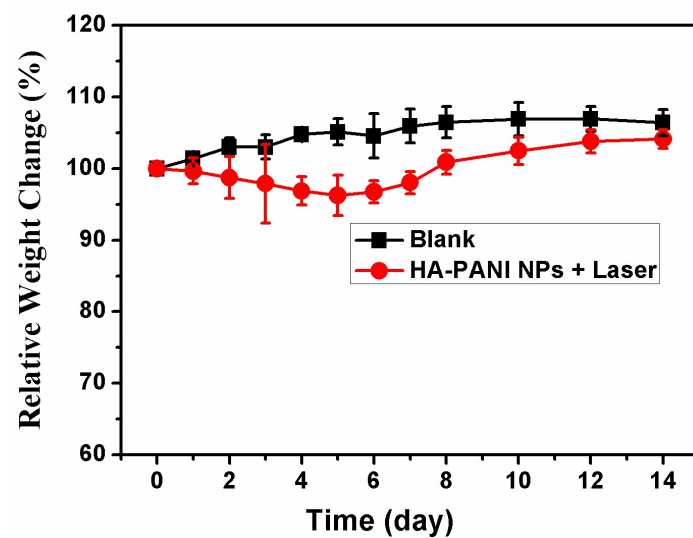

**Fig. S4** Changes in body weight obtained from mice: a saline solution of HA-PANI NPs was injected into the tumor site and exposed to 808 nm laser (HA-PANI NPs + Laser); blank group with neither injection of HA-PANI NPs nor 808 nm laser exposure (Blank).
